# Supplementary material
Source: PubMed Central journal article supplement (PMC1838588)
Supplement: pnas_0611224104_4.pdf [file pnas_0611224104_4.pdf]

**Table 1. Overall and strictly interannual correlations between the time series of eastern-Eurasian cold-season temperatures and Mauna Loa Observatory amplitude at zero and various lags**

| Lags | 1970-1991 <sup>#</sup>                           |              |                           | 1979-2000          |                    |              |
|------|--------------------------------------------------|--------------|---------------------------|--------------------|--------------------|--------------|
|      | Overall                                          | Interannual* | Fraction (%) <sup>§</sup> | Overall            | Interannual        | Fraction (%) |
| 0yr  | <b>0.40</b> <sup>+</sup> (0.16) <sup>&amp;</sup> | -0.13 (0.02) | -                         | 0.26 (0.07)        | 0.11 (0.01)        | -            |
| 1yr  | <u>0.62</u> (0.38)                               | 0.26 (0.07)  | 18                        | <i>0.34</i> (0.12) | -0.07 (0.00)       | -            |
| 2yr  | <u>0.56</u> (0.31)                               | 0.04 (0.00)  | 1                         | <b>0.47</b> (0.22) | <b>0.43</b> (0.18) | 84           |
|      | 1979-1989                                        |              |                           | 1990-2000          |                    |              |
|      | Overall                                          | Interannual  | Fraction (%)              | Overall            | Interannual        | Fraction (%) |
| 0yr  | 0.32 (0.10)                                      | 0.33 (0.11)  | -                         | 0.06 (0.00)        | 0.02 (0.00)        | -            |
| 1yr  | <i>0.51</i> (0.26)                               | 0.01 (0.00)  | 0                         | 0.13 (0.02)        | -0.12 (0.01)       | -            |
| 2yr  | <b>0.62</b> (0.38)                               | 0.39 (0.15)  | 40                        | <i>0.51</i> (0.26) | <i>0.49</i> (0.24) | 92           |

<sup>#</sup>

Temperature base period and amplitude lagging as indicated.

\* Correlations after subtracting a 5-yr smoothed curve (five-point binomial filter) from the original time series.

<sup>&</sup> Values in brackets indicate variance explained ( $r^2$ ).

<sup>§</sup> Fraction of variance explained by interannual component; only given when overall correlation is statistically significant and interannual correlation is positive.

<sup>+</sup> Values in underlined-bold, bold, and italic text are statistically significant at the 99%, 95%, and 90% levels, respectively (Student's  $t$  test, one-tailed).
