# Supplementary material
Source: PubMed Central journal article supplement (PMC1838588)

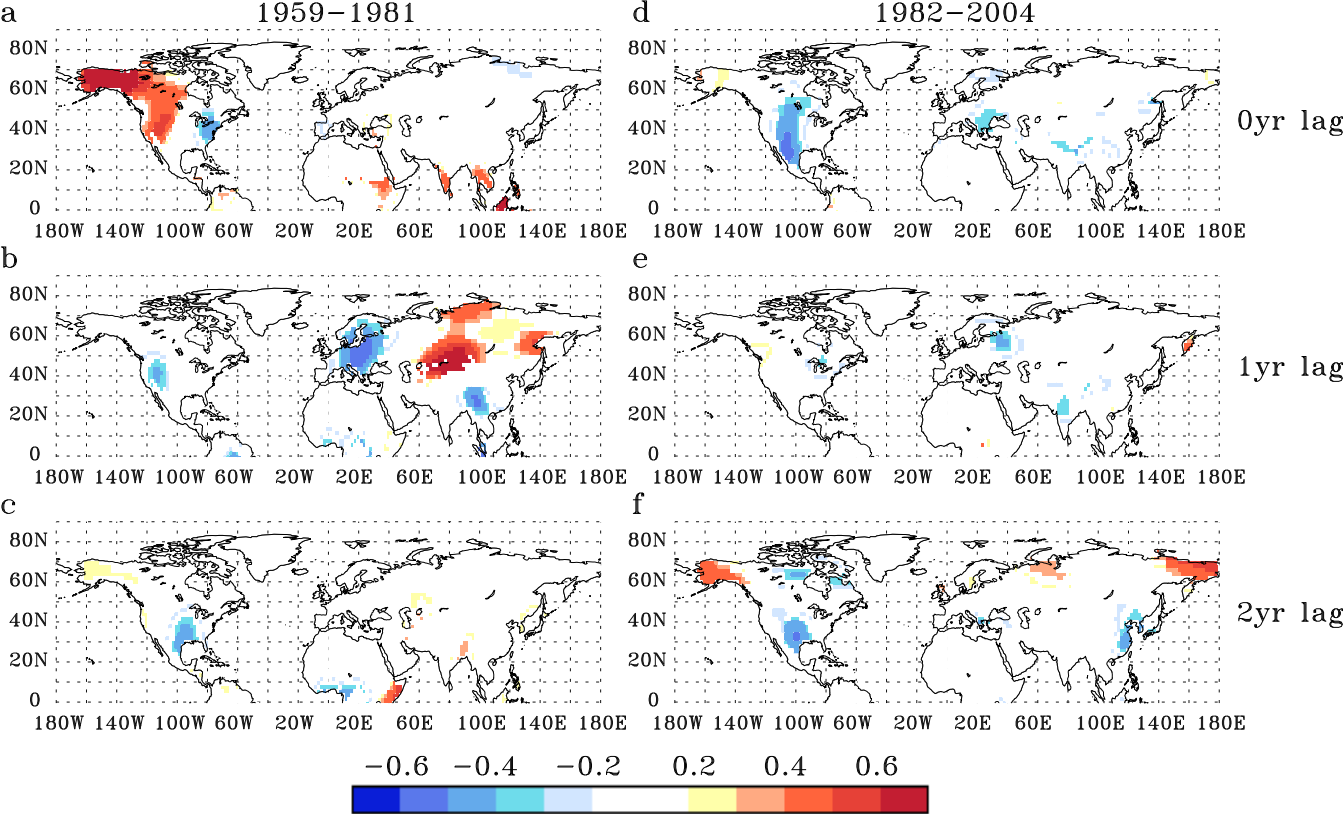

Supplement: pnas_0611224104_1.pdf [file pnas_0611224104_1.pdf]

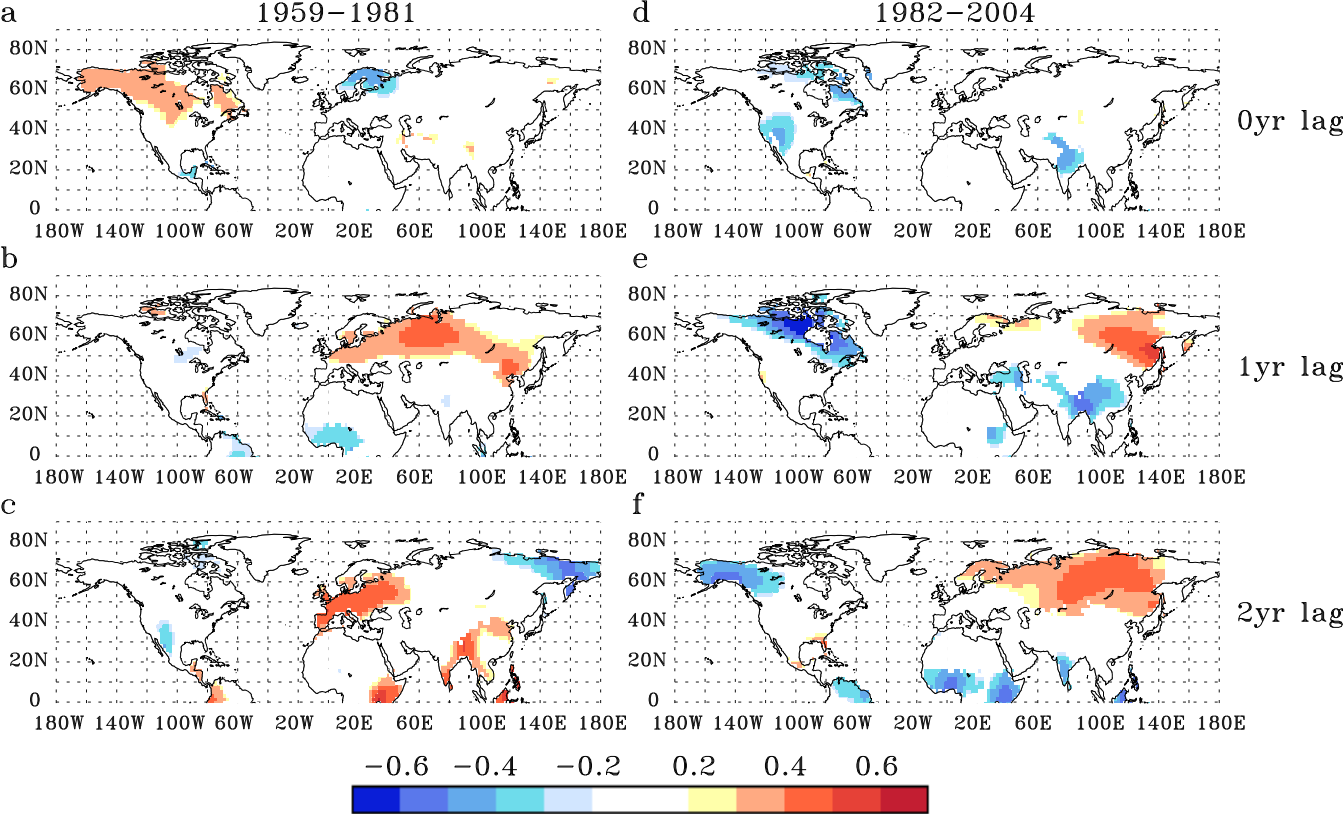

Supplement: pnas_0611224104_2.pdf [file pnas_0611224104_2.pdf]

EURASIA (30°N–80°N,60°E–East.Limit)

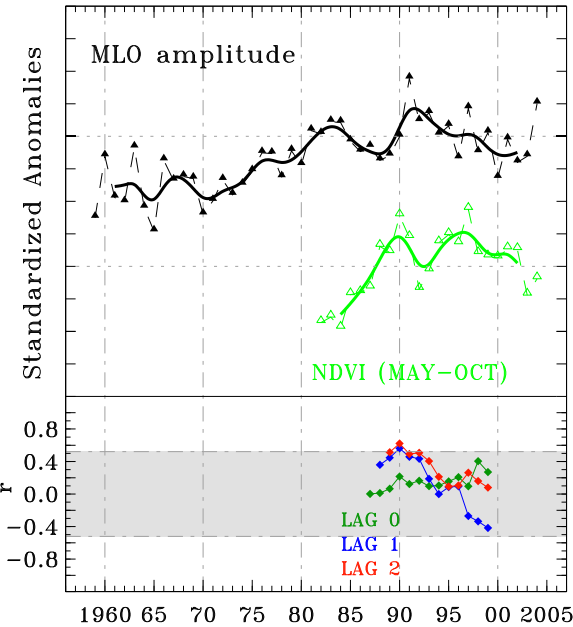

Supplement: pnas_0611224104_3.pdf [file pnas_0611224104_3.pdf]
